1 **Charge influences substrate recognition and self-assembly of hydrophobic FG sequences**

2

3 Wesley G. Chen<sup>1</sup>, Jacob Witten<sup>1,2</sup>, Scott C. Grindy<sup>3</sup>, Niels Holten-Andersen<sup>3</sup>, Katharina

4 Ribbeck<sup>1,a</sup>

5 <sup>1</sup>Department of Biological Engineering, Massachusetts Institute of Technology, Cambridge, MA

6 02139

7 <sup>2</sup>Computational and Systems Biology Initiative, Massachusetts Institute of

8 Technology, Cambridge, MA 02139

9 <sup>3</sup>Department of Materials Science and Engineering, Massachusetts Institute of Technology,

10 Cambridge, MA 02139

11 <sup>a</sup>Corresponding author:

12 Katharina Ribbeck

13 Email: [ribbeck@mit.edu](mailto:ribbeck@mit.edu)

14 Telephone: +1 (617) 715-4575

15 MIT, Department of Biological Engineering

16 77 Massachusetts Avenue

17 Rm. 56-341

18 Cambridge, MA 02139

19 USA

20

21 **Abstract:**

22 The nuclear pore complex controls the passage of molecules via hydrophobic phenylalanine-  
23 glycine (FG) domains on nucleoporins. Such FG-domains consist of repeating units of FxFG,  
24 FG, or GLFG sequences, which can be interspersed with highly charged amino acid sequences.  
25 Despite the high density of charge exhibited in certain FG-domains, if and how charge influences  
26 FG-domain self-assembly and selective binding of nuclear transport receptors is largely  
27 unexplored. Studying how individual charged amino acids contribute to nuclear pore selectivity  
28 is challenging with modern *in vivo* and *in vitro* techniques due to the complexity of nucleoporin  
29 sequences. Here, we present a rationally designed approach to deconstruct essential components  
30 of nucleoporins down to 14 amino acid sequences. With these nucleoporin-based peptides, we  
31 systematically dissect how charge type and placement of charge influences self-assembly and  
32 selective binding of FG-containing gels. Specifically, we find that charge type determines which  
33 hydrophobic substrates FG sequences recognize while spatial localization of charge tunes  
34 hydrophobic self-assembly and receptor selectivity of FG sequences.

35

36

37

38

39

40

41

42

43

## 44 **Introduction**

45 The nuclear pore complex (NPC) is a megadalton structure that controls the exchange of material  
46 between the nucleus and cytoplasm (1-3) through a combination of passive and facilitated  
47 diffusion. Above a ~30 kDa cutoff, proteins require complexation with nuclear transport  
48 receptors (NTRs) to efficiently translocate at rates of nearly one thousand molecules per second  
49 (4-7). This fast translocation rate relies on transient interactions between hydrophobic  
50 phenylalanine-glycine (FG) domains on intrinsically disordered FG-containing nucleoporins  
51 (FG-nups) and hydrophobic patches on NTRs (1,5,8-20). Without such assistance of NTRs,  
52 proteins remain excluded from the NPC. Despite the necessity of FG-domains (which contain  
53 repeating units of FG sequences such as FxFG or GLFG) for facilitated diffusion and self-  
54 assembly of the selective matrix, how hydrophobic FG-domains exhibit such selectivity to  
55 specific hydrophobic domains on NTRs and what parameters can tune such molecular  
56 recognition necessary for facilitated transport remain open questions. Sequence analysis and  
57 molecular dynamic simulations predict that the biochemistry and charge surrounding individual  
58 FG sequences should play an essential role in FG-mediated molecular recognition and therefore  
59 determine the organization and selectivity of the nuclear pore (4,6,21-24). However, due to the  
60 complexity and redundancy of FG-nups within NPCs, a systematic biochemical dissection of the  
61 amino acid space surrounding individual FG sequences has remained an experimental challenge.  
62  
63 In this study, we investigate if and how electrostatic interactions surrounding FG sequences tailor  
64 both the self-assembly of FG sequences and the selective recognition of hydrophobic substrates.  
65 For systematic dissection of how charge type and localization influence FG-mediated selectivity,  
66 full FG-domains are too degenerate and complex to provide insight into how single amino acids

67 contribute to selectivity. To overcome this challenge, we established a novel approach that uses  
68 short peptides. The use of peptides and polypeptides has previously been essential in design of  
69 other minimalistic polymer-based biomaterials such as extracellular matrices (25), silk proteins  
70 (26,27), and elastin-like polypeptides (28-30). While peptides may not recapitulate all properties  
71 of the original protein, they allow for mechanistic dissection of structure and function at the  
72 single amino acid level. Here, peptides can be designed to represent the essential components of  
73 charged FG-nups, allow for single amino acid substitutions, and can be engineered to self-  
74 assemble into hydrogels mimicking the high density of FG-domains found in certain FG-nups.  
75 With this peptide system, we show how the amino acids surrounding FG sequences has a  
76 significant impact on hydrophobic interactions necessary for molecular recognition of substrates  
77 and self-assembly. Choice of anionic and cationic residues is able to reverse the selective  
78 recognition of the FG-based gels. This allows for FG sequences to discriminate between  
79 substrates exhibiting various types of hydrophobic domains using a combination of hydrophobic  
80 and electrostatic interactions. Moreover, spatial localization of charge determines the degree to  
81 which electrostatic interactions influence hydrophobic interactions with FG sequences. Lastly,  
82 we find that the choice of charged residues such as lysine, arginine, glutamic acid, and aspartic  
83 acid have different contributions to the self-assembly of FG sequences while electrostatic  
84 properties dominate for molecular recognition.

85

## 86 **Results**

87 As a model FG-nup to base our FG-domain mimicking peptides on, we chose the yeast  
88 nucleoporin Nsp1 as it is essential in *Saccharomyces cerevisiae* (31) and contains a repeating  
89 subsequence (284-553) with a high density of charge (Figure 1A). Sequence analysis of 15-

90 repeats of FG-domains in Nsp1<sup>284-553</sup> reveals a non-uniform distribution of charge in the  
91 sequence space separating FG sequences (here, specifically, we use the FSFG sequence).  
92 Cationic residues can be found near the center and edges of the repeat whereas anionic amino  
93 acids reside at least three positions away from FSFG sequences (Figure 1B). Moreover, we find  
94 several highly conserved lysines (K) situated two to three amino acids away from the FG-domain  
95 at positions 6 and 17 and a conserved glutamic acid (E) at position 9 (Figure 1A). The non-  
96 uniformity in conserved charge distributions and amino acid identity suggest that charge and  
97 biochemical properties of amino acid sidechains may play an essential role in governing how  
98 neighboring FG sequences respond to environmental substrates and that significant function can  
99 be encoded in the non self-assembling domains of FG-nups.

100

101 For testing each of the parameters of charge type, placement, and sidechain biochemistry and  
102 how they affect FG function, we synthesized the consensus Nsp1 peptide sequence and also a  
103 simplified 14 amino acid version. The deconstructed peptides consist of two terminal FSFG  
104 sequences with neighboring charged or neutral amino acids. To establish how the presence of  
105 charge affects FG-mediated selectivity, we designed the peptide sequence  
106 FSFGAXAXAFSFG, where X is either a lysine (K), glutamic acid (E) or a neutral serine (S) as  
107 seen in Figure 1C. Since lysine overall is the most highly conserved residue in this wildtype  
108 Nsp1 subsequence, we use the lysine-containing peptide as the reference for all other  
109 experimental comparisons (termed FGAK peptide). To determine if the selectivity properties of  
110 FG-domains could be reversed by switching neighboring charge types, we synthesized the  
111 anionic peptide FGAE. As a control of how the presence of charge influences FG function, we  
112 synthesized the neutral FGAS-peptide in which the lysines have been converted to serines. To

113 test how the spatial localization of lysines affect FG function, we designed two variants of  
114 FGAK in which the lysines have been placed directly adjacent to the FG-domain or separated by  
115 two alanines (termed FGK and FGA<sub>2</sub>K, respectively, Figure 1D). Last, it appears that only  
116 certain charged amino acids such as lysines and glutamic acids (E) exhibit 100% conservation at  
117 positions 6, 9, and 17 (Figure 1A), suggesting amino acid biochemistries may also regulate FG-  
118 based molecular recognition. To test how chemical structures of the amino acid sidechains  
119 affects structure and function of FG-domains, we designed a third class of peptides in which the  
120 lysines are replaced with cationic arginines (R, FGAR) or aspartic acids (D, FGAD) as seen in  
121 Figure 1E. With these 14-amino acid nucleoporin-based peptides, we now analyze how single  
122 amino acid substitutions can alter the selective binding and self-assembling capabilities of  
123 individual FG-domains.

124

### 125 **Characterization of charge presence on FG-mediated self-assembly**

126 Before studying the selective recognition of the FG-based peptides, we first establish if the  
127 peptides are capable of forming gels at a concentration relevant to intact nuclear pore complexes.  
128 By measuring the mechanical properties of the peptide solutions, we can further understand how  
129 charge affects FG-domain interactions. We used a concentration of 2% (w/v) for each of the  
130 peptides, which corresponds to 28 mM concentrations of FG sequences, a value that is well  
131 within estimations of FG sequences found in densely packed NPCs (18,32,33). To quantify  
132 gelation, we measure the stiffness of the resulting material using small amplitude oscillatory  
133 frequency sweeps. We report the storage ( $G'$ ) and loss ( $G''$ ) modulus of the peptide solution and  
134 specify that a gel forms when  $G'$  is greater than  $G''$ , which indicates successful self-assembly of  
135 a stable network of peptides. The consensus peptide sequence of Nsp1 was unable to form a gel

136 and flowed when inverted, so it was not suitable for further analysis. For the simplified peptides,  
137 we first establish that the reference peptide FGAK is able to form hydrogels with a stiffness of  
138  $10^4$  Pa across the frequencies tested (Figure 2A). To ensure that the FG sequences are  
139 responsible for the self-assembly process, we converted the hydrophobic phenylalanines to  
140 serines (SGAK). With this substitution, the peptide solution remains in an aqueous phase and no  
141 longer exhibits a dominant storage modulus (Supplementary Figure 1), suggesting that  
142 phenylalanine provides the necessary hydrophobic interactions for self-assembly. Reversing the  
143 charge to glutamic acids (FGAE peptides) reveals that the gel-forming properties are maintained  
144 with stiffness between 5-9 KPa at the frequencies tested (Figure 2B). To determine if the charge  
145 is responsible for maintaining the hydrated state of the gel in the self-assembly process, we  
146 compared the material to the solution of neutral FGAS peptides. Without the charge, FGAS  
147 precipitates out of solution (data not shown). Together, these results indicate that the presence of  
148 charge is essential in maintaining a hydrated network of FG sequences in self-assembly.  
149 However, too much charge increases the solubility and prevents gelation, as seen with the  
150 consensus sequence peptide. Without the presence of electrostatic repulsion within the gels, the  
151 network collapses and forms a precipitate. Moreover, for this class of designed peptides, FG  
152 sequences are essential for gelation, which is the same as for intact FG-nups (9,10).

153

#### 154 **Transport of NTF2 is asymmetric in cationic and anionic FG-based gels**

155 To understand if the FG-based peptide gels are able to recapitulate the selective recognition  
156 properties of the native FG-nups, we test for their ability to enrich and select for intact nuclear  
157 transport receptors (NTRs) in an FG-dependent manner. As a model NTR, we choose NTF2 as it  
158 contains an essential tryptophan (W7) that is required for binding to the FG-domains. By

159 substituting the tryptophan for an alanine (W7A) to ablate FG-binding capabilities(14), we can  
160 determine if the FG-domains are available in the gel for NTR binding. First, we determine if the  
161 positively charged FGAK gel is able to preferentially select for NTF2 compared to the W7A  
162 mutant. To prepare gels for selective transport assays, we dissolve FGAK peptides at 2% (w/v)  
163 as before and load the material into capillaries. Fluorescently labeled NTF2 or W7A is then  
164 injected into the capillary and sealed to create a 1-D diffusion chamber where the diffusion  
165 profile is monitored for up to 5 hours at one-minute intervals (Figure 2C). To quantify the  
166 selective binding of the various transport receptors into gels, we estimate the effective diffusion  
167 coefficient of the receptors in the gel using the time-evolving fluorescent profiles and the  
168 maximum accumulation of the reporters at the interface as metrics for determining how well the  
169 gel is able to differentiate between native NTF2 and W7A. Lower effective diffusivities and  
170 higher accumulation indicate stronger interactions with the gel.

171  
172 As seen in Figure 2D and F, the FGAK gel accumulates NTF2 at higher concentrations at the gel  
173 interface compared to the W7A mutant. While accumulation at the interface is different, we find  
174 the effective diffusivities to be similar (Figure 2F), suggesting that the favorable hydrophobic  
175 interactions are weak and reversible, which is consistent with previous models of nuclear pore  
176 transport. These experiments show that FGAK has a selective binding preference for NTF2 over  
177 the W7A mutant, indicating that FG-domains are available and functional as a binding domain. It  
178 also appears that the short peptide gels cannot recapitulate the unique facilitated diffusion  
179 properties of the intact nuclear pore. For instance, native NTRs that are overall anionic and  
180 hydrophobic are predicted to bind to and transport into overall cationic nucleoporin gels (21,22).  
181 Since the peptides form fibers and sheets (Figure 2A-B) that are not observed in native



182 nucleoporin assemblies (24), they likely do not form the requisite saturated disordered matrix  
183 that allows for exclusion of inert molecules that typically cannot transport through NPCs (9).  
184 Nevertheless, the designed FGAK peptide has the sensitivity to recognize single hydrophobic  
185 amino acid differences between NTF2 and W7A, which is a necessary first step for selective  
186 hydrophobic transport.

187  
188 To test if binding to NTRs is sensitive to charged residues neighboring the FG domain, we  
189 determine if FGAE is able to recapitulate the same selective properties of FGAK, despite the  
190 reversal of charge. As seen in Figure 2E-F, FGAE selects for NTF2 and W7A equally at the  
191 interface and there is no significant difference in diffusion coefficients. These results indicate  
192 FGAE is unable to differentiate between the native and mutant form of NTF2. Since FGAK and  
193 FGAE exhibit different selective properties for NTF2 and W7A, we further investigate if the  
194 asymmetry results from a structural issue or a charge based selective recognition. Figures 2A-B  
195 show that FGAK and FGAE gels exhibit structural differences at the microscopic level (sheets  
196 vs. fiber assembly) and macroscopic level (inset). It is possible that due to structural differences,  
197 the FG sequences are not exposed and unavailable for binding by NTF2 in the FGAE gel. To test  
198 if hydrophobic domains are accessible, we use Nile Red dye, which fluoresces within  
199 hydrophobic environments. Supplementary Figure 2 shows that Nile Red fluorescence is  
200 detected in both FGAK and FGAE gels, indicating that the uncharged hydrophobic dye is able to  
201 interact with the FG-domains within the peptide-based gels despite the structural variation. These  
202 results suggest that the lysine and glutamic acid are important in regulating the selective  
203 properties of the FG sequences from a charge interaction perspective, as opposed to simply  
204 altering the gel's microstructure.

205

206 **Presence of charge regulates the selective recognition of FG-domains**

207 Although NTRs such as Importin $\beta$  and NTF2 have well-characterized specificity for particular  
208 FG-nup sequences, intact receptors contain multiple binding pockets with varying affinities and  
209 charge distributions, or require dimerization for function, which complicates systematic analysis  
210 of charge contribution. Hence, as a replacement for complex NTRs, we designed fluorescent  
211 peptide reporters with defined spatial arrangements of charged and non-polar amino acids to  
212 systematically test the contribution of charge in hydrophobic selectivity (Figure 3B). The first  
213 two reporter peptides contain three phenylalanines for a hydrophobic tail that enable binding to  
214 the FG sequences, but one contains an adjacent anionic sequence composed of glutamic acids  
215 (termed Hydrophobic (-)), while the other contains cationic lysines (Hydrophobic (+)). As  
216 controls, we engineered two more reporters where phenylalanines were converted to hydrophilic  
217 asparagines (N), and termed Hydrophilic (- or +) and should not interact with FG-domains. To  
218 confirm that the synthetic hydrophobic reporters are able to interact with the aromatic phenyl  
219 group in FG domains in the gels independently of their charged domains, we used phenyl-  
220 sepharose columns to test for hydrophobic interactions. This assay has previously been  
221 successful in isolating intact NTRs from cell lysate extracts (12). As seen in Supplementary  
222 Figure 3, both hydrophobic reporters show an increase in retention time compared to their  
223 hydrophilic counterpart, indicating that the hydrophobic interactions are occurring between the  
224 hydrophobic reporters and the phenyl groups on the sepharose independent of the displayed  
225 charge.

226

227 Using the FGAK gels, we first tested if the two hydrophobic fluorescent reporters demonstrate  
228 different selective uptake into the gel. FGAK was dissolved at 2% (w/v), loaded into glass  
229 capillaries, and bathed in a fluorescent reporter solution to test for selective binding. Reporters  
230 were loaded into capillaries at 10  $\mu\text{M}$  concentrations and interactions were monitored for five  
231 hours at the buffer-gel interface. To quantify the selective binding of the various reporters into  
232 the respective gels, we again estimate the effective diffusion coefficient of the reporters in the gel  
233 and the maximum accumulation of the reporters at the interface as metrics for determining how  
234 well the gel is able to differentiate between hydrophobic and charged domains in the reporters.  
235  
236 Figure 3C shows that the cationic FGAK gel interacts with the Hydrophobic (-) reporters, with  
237 significant accumulation inside the gel. Quantifying the maximum concentration at the interface,  
238 we see that there is approximately a 2-fold increased enrichment compared to the Hydrophilic (-)  
239 reporter, which does not contain the hydrophobic tail. This result suggests that FG sequences in  
240 FGAK recognize reporter phenylalanines when the reporter exhibits negative charge. The  
241 contribution of hydrophobic interactions is further corroborated by the strong reduction in  
242 effective diffusion coefficient from 7  $\mu\text{m}^2/\text{min}$  for Hydrophilic (-) down to below 1  $\mu\text{m}^2/\text{min}$  for  
243 Hydrophobic (-), indicating that the hydrophobic interactions are able to induce tighter binding in  
244 the context of electrostatic attraction. In fact, the interactions are so strong that the Hydrophobic  
245 (-) reporters essentially do not diffuse over the five-hour period analyzed, suggesting that the  
246 binding is irreversible. In contrast, when the reporters contain a cationic tail, we see that  
247 Hydrophobic (+) and Hydrophilic (+) reporters diffuse into the gel with coefficients of 380  
248  $\mu\text{m}^2/\text{min}$  and 2000  $\mu\text{m}^2/\text{min}$ , respectively. The Hydrophobic (+) reporters are able to bind 1.5  
249 times above the original bath concentration at the interface whereas Hydrophilic (+) reporters

250 equilibrate with no discernible partitioning (Figure 3D). These results show that hydrophobic  
251 interactions can occur under electrostatically repelling environments, but the interactions are  
252 much weaker compared to the Hydrophobic (-) reporters. Moreover, by lowering the salt  
253 concentrations from 200 mM NaCl to 20 mM to decrease electrostatic screening and increase  
254 electrostatic repulsion, the accumulation at the interface decreases and the diffusion coefficient  
255 shows a trend toward an increase (Figure 3D), indicating that the repulsion weakens the overall  
256 strength of hydrophobic interactions with FG-domains. These results show that the lysines  
257 confer upon FGAK gels the striking ability to distinguish between two substrates that contain the  
258 same hydrophobic domain but with different surrounding charge types. In particular, the lysines  
259 allows for increased binding to hydrophobic domains with neighboring anionic residues.

260  
261 The analysis of the Nsp1 repeat consensus sequence (Figure 1A-B) suggests that the conserved  
262 location of lysines within 2-3 amino acids from the FG sequences may be relevant for FG-  
263 mediated molecular recognition. To determine how the spatial localization of lysines affects FG  
264 sequence differentiation between various hydrophobic domains, we tested if placing lysines  
265 immediately adjacent to FG sequences (FGK), or moving them 3 amino acids away (FGA<sub>2</sub>K),  
266 would affect the sequence's selectivity compared to the original arrangement in the FGAK  
267 peptide. Using the same conditions as before, both peptides were dissolved at 2% (w/v). While  
268 FGA<sub>2</sub>K peptides readily formed a stiff material and could be tested for selective uptake, the FGK  
269 peptide gel is two orders of magnitude less stiff, flowed when inverted, and dispersed when  
270 loading fluorescent reporters (Figure 3A). Therefore FGK could not be analyzed for transport  
271 and the rest of the analysis will be a comparison on diffusion and accumulation between only  
272 FGAK and FGA<sub>2</sub>K. As previously shown in Figure 3C and D, the FGAK gel selectively

273 enriched for the Hydrophobic (-) reporter but failed to uptake the Hydrophobic (+) reporter to the  
274 same degree. When comparing the two anionic Hydrophobic (-) and Hydrophilic (-) reporters in  
275 FGA<sub>2</sub>K, the diffusivity of Hydrophobic (-) is an order of magnitude lower compared to  
276 Hydrophilic (-), showing that the combination of hydrophobic and electrostatic attraction  
277 synergizes for strong binding. However, the max accumulation at the interface for the two  
278 anionic reporters is similar, indicating FGA<sub>2</sub>K gel is unable to differentiate between the two  
279 reporters to the same degree as the original FGAK gel (Figure 3E). For cationic reporters, the  
280 Hydrophobic (+) peptide accumulates within the gel and has an order of magnitude lower  
281 diffusivity compared to the Hydrophilic (+) reporter. Moreover, the accumulation of  
282 Hydrophobic (+) reporters for FGA<sub>2</sub>K gels is higher compared to FGAK gels (Figure 3F). These  
283 data show that placing lysines within 2 amino acids of FG-domains (FGAK), approximately  
284 corresponding to the 1 nm Debye length at physiologically relevant salt concentrations, such as  
285 in our experimental conditions, enables hydrophobic selectivity of substrates with opposite  
286 charge. Placing lysines 3 amino acids away (FGA<sub>2</sub>K) reduces the contribution of electrostatic  
287 interactions in determining hydrophobic FG-mediated selectivity. As a result, by increasing the  
288 distance between charged residues and FG sequences, the FG sequences becomes less dependent  
289 on the electrostatic profile surrounding the hydrophobic substrates during selective transport.

290

### 291 **Charge reversal flips selectivity of FG-domains**

292 Since lysines in the FGAK gel help FG sequences differentiate between reporters containing  
293 anionic or cationic hydrophobic domains, we next asked if FG-mediated recognition could be  
294 reversed by replacing lysines with anionic glutamic acids (FGAE). Using the same class of  
295 fluorescent reporters, we find that the selectivity of FGAE gels is reversed from FGAK-gels

296 (Figure 4A-D). Again, the selectivity is a function of both hydrophobic and electrostatic  
297 interactions as the Hydrophilic (+) reporters accumulated 2-fold less at the interface compared to  
298 Hydrophobic (+) reporters (Figure 4D). Moreover, the diffusion coefficient for Hydrophobic (+)  
299 is an order of magnitude lower than for Hydrophilic (+). Conversely, both Hydrophobic (-) and  
300 Hydrophilic (-) reporters did not interact significantly with the gel and exhibited similar effective  
301 diffusion coefficients, showing that electrostatic repulsion prevents hydrophobic interactions  
302 with FG sequences. Together, these data suggest that charge proximal to FG sequences can tune  
303 hydrophobic selectivity and that charge is essential in determining which hydrophobic moieties  
304 FG sequences can recognize.

305

### 306 **Sidechain biochemistry as a regulator of assembly**

307 Lastly, we tested how sidechain biochemistry of charged amino acids affect FG sequence  
308 function for both self-assembly and molecular recognition of transport molecules. From the Nsp1  
309 consensus sequence analysis, we observed that the predominant cation is lysine rather than  
310 arginine, suggesting that the two cations may not be treated equally. Similarly, glutamic acids are  
311 conserved closer to FG sequences whereas aspartic acids appear closer to the central region of  
312 the spacer sequences and are not as well conserved. To test the role of sidechain differences, we  
313 first compare how FGAR gels compared to FGAK. In the diffusion assay, we find that FGAR  
314 gels have similar uptake properties when compared to FGAK gels (Figure 4A, E), where the  
315 Hydrophobic (-) reporter accumulates and interacts with the gel interface while the Hydrophobic  
316 (+) reporter does not accumulate and instead diffuses near freely into the gel (Figure 4E and 4F).  
317 These data suggest that that from an electrostatic standpoint, arginines are just as capable as  
318 lysines in helping FG sequences differentiate between various types of hydrophobic substrates.

319 However, mechanically, FGAR forms gels that exhibited an approximate stiffness of 2000 Pa  
320 throughout the frequency sweep (Supplementary Figure 4C), which is 4-fold more compliant  
321 than FGAK gels. The changes in the mechanical properties of the FGAK and FGAR gels suggest  
322 that the lysines and arginines may predominantly affect the structural self-assembly of FG-  
323 domains. Indeed, from TEM analysis, we find that FGAR form different structures compared to  
324 FGAK (Supplementary Figure 4D). To compare FGAD and FGAE gels, we find that FGAD  
325 does not form a gel at the standard 2% (w/v) and forms no repeating structures (Supplementary  
326 Figure 4A-B), suggesting that the small chemical changes between glutamic acid and aspartic  
327 acid are able to transition the material from a selective gel to a viscous solution. Together, these  
328 data show the detailed amino acid biochemistry, in addition to net charge, is an important  
329 regulatory parameter in determining the structure of self-assembled FG-domains with minor  
330 effects on selectivity.

331

### 332 **Tryptophan interactions are similarly modulated by electrostatics**

333 An essential question in the selectivity of FG-domains is how generalizable the tunability of  
334 hydrophobic selectivity is to other natural aromatic amino acids. In previous assays with the  
335 designed reporters, we chose phenylalanines as the representative aromatic residue for  
336 hydrophobic interactions with FG-domains. In native NTRs such as NTF2 and other transport  
337 receptors, tryptophan is commonly used for the transient hydrophobic interactions required for  
338 transport. To test if the electrostatic dependence still exists when phenylalanines are converted to  
339 tryptophans, we compared two new hydrophobic reporters Hydrophobic (+W) and Hydrophobic  
340 (-W) to the original hydrophobic phenylalanine reporters (now termed +F and -F, respectively,  
341 for the hydrophobic residue). As seen in Figure 5, the tryptophan reporters are modulated by

342 electrostatic interaction in a similar manner to phenylalanine reporters. We find that the max  
343 accumulated fluorescence at the interface and diffusion between Hydrophobic -F and -W  
344 reporters are not significantly different (Figure 5A). For cationic reporters, when phenylalanines  
345 (+F) are substituted for tryptophans (+W), the reporters exhibit similar max interface properties  
346 but tryptophan (+W) reporters show a slight trend toward slower diffusion (Figure 5B),  
347 indicating that although both aromatic residues can be modulated by electrostatic interactions,  
348 choice of hydrophobic residue will have small but potentially significant differences in transport  
349 properties. These results reveal that the phenomenon of electrostatic interactions regulating  
350 hydrophobic interactions may be a generalizable phenomenon and is not restricted to  
351 phenylalanines. Moreover, the choice of type of non-polar amino acid is now established as  
352 another parameter in which selective transport can be tuned.

353

## 354 **Discussion**

355 Our study shows how the environment surrounding FG sequences tunes hydrophobic interactions  
356 necessary for correct molecular recognition of hydrophobic substrates. Here, we explicitly show  
357 how the presence, placement, and type of charged amino acid are all essential parameters in  
358 controlling FG function for these reduced FG repeats. The method of using peptides based on  
359 consensus sequences of Nsp1 reveals how complex function can be encoded in minimal  
360 sequence space. The work here supports previous theoretical predictions that electrostatic  
361 interactions may be an important regulator of nuclear pore selectivity (22) and sequence  
362 observations that the bias in the net charge of nuclear transport receptors may be important in  
363 NPC transport (21). Moreover, recent reports on how charge influences interactions with  
364 hydrophobic surfaces (8,34) emphasize that the interplay between electrostatics and



365 hydrophobicity may be a fundamental process for different biological functions such as  
366 molecular recognition and protein folding. Here, we provide an example of how these  
367 electrostatics and hydrophobicity can tune the molecular recognition properties of biological  
368 supramolecular structures.

369

370 Our work shifts the spotlight from analyzing only how hydrophobicity determines nuclear pore  
371 selectivity to the underappreciated contribution of electrostatics in molecular recognition  
372 (9,11,12,35). The results described here provide insight on how individual hydrophobic FG-  
373 sequences may acquire the astounding ability to distinguish a particular subset of hydrophobic  
374 substrates using a combination of electrostatic and hydrophobic interactions. Our data also imply  
375 that substrate interaction with the FG-containing hydrogel is not a binary effect, but can be tuned  
376 by the placement of charge surrounding FG domains to achieve a range of transport behaviors,  
377 from complete retention at the interface to free diffusion through the hydrogel, as depicted  
378 schematically in Figure 6.

379

380 We recognize that although the peptides can answer questions on how the molecular recognition  
381 of FG-sequences can be manipulated by the precise placement of charged amino acids, the short  
382 peptide gels cannot recapitulate the unique facilitated diffusion properties of the intact nuclear  
383 pore. This likely arises from structural differences, as short peptides form fibers and rods, which  
384 are not observed and predicted in the native nuclear pore. Future work to address these  
385 challenges include synthesizing longer peptides consisting of multiple consensus repeats to  
386 determine how repeat number influences structure and selective recognition. Nevertheless, the  
387 current peptides provide unique advantages that are absent in more complex and degenerate

388 systems. For instance, previous studies with intact nucleoporins containing multiple repeats of  
389 FG-domains suggest that charge primarily plays a structural role in the cohesion of the self-  
390 assembled matrix (36), which results in altered selective properties of the gel. In contrast,  
391 peptides with single repeats show that electrostatic interactions directly influence how biological  
392 substrates interact with hydrophobic FG sequences for molecular recognition. FG-containing  
393 peptides can capture at single amino acid resolution on how the interplay between hydrophobic  
394 and electrostatic interactions. These results also support recent work where ImpB was recognized  
395 to have varying binding capacities with synthetic FG-containing polyacrylamide gels depending  
396 on the charged state of the material (37). We believe this is a useful approach that complements  
397 other well-established methods used to understand the selective transport mechanism of NPCs  
398 such as the *in vivo* minimal nuclear pore complex (18,19), gel and selectivity analysis of  
399 individual nucleoporins (9-11,38), and binding interactions with surface-grafted nucleoporin  
400 films (36,39-41). Moreover, we expect that this rational approach using conserved repeating  
401 sequences can be expanded to further study other biological gel systems such as mucus, byssal  
402 threads, and cartilage, where complex disordered proteins based on repeat units and reversible  
403 crosslinking contribute a significant proportion of the material (42-44).

404

#### 405 **Materials and Methods:**

406 Sequence analysis:

407 Sequence logo of consensus sequence was generated using Berkeleys' WebLogo software(45) by  
408 aligning 15 repeats according to FSFG as references. Conserved fraction was calculated for  
409 positive charges (# cationic residues K or R)/(15 repeats) and similarly for negative charges (#  
410 anionic residue E or D)/(15 repeats) at each position indicated.

411  
412 NTF2 Expression and Labeling  
413 pQE30-NTF2-6xHis was a gift from the Gorlich lab and transformed into DH5alpha cells for  
414 cloning. A cysteine was inserted for fluorescent labeling after the 6x His-tag using standard site  
415 directed mutagenesis techniques using the two primers (5' –  
416 ctcaagcttaagcttagcagtgatggatggatgatgagatctg - 3' and 5' -  
417 cagatctcatcaccatcaccatcactgctaagcttaattagctgag – 3') to form pQE30-NTF2-6xHis-Cys. The  
418 W7A-Cys mutant containing the terminal cysteine was created by using pQE30-NTF2-6xHis-  
419 Cys and applying standard site direct mutagenesis protocols with the following primers (5' –  
420 tgaggagccaattgttccgcatcggtttatcacccatg – 3' and 5' – catgggtgataaacccgatcgcggaacaattggctcctca  
421 – 3'). Expression of NTF2-Cys and W7A was completed in OverExpress C41(DE3) cells  
422 (Lucigen) and purified using standard nickel column purification and ion exchange columns.  
423 Labeling of NTF2-Cys and W7A-Cys was completed using Fluorescein-5-maleimide  
424 (ThermoFischer Scientific, Catalog #F150) using their recommended protocol and gel purified.  
425 Labeling efficiency was approximately 50%. Final concentrations of NTF2 and W7A for  
426 transport were adjusted to 10 uM concentrations with 10% of the population labeled.

427  
428 Peptide and Gel Preparation:  
429 Unless specified otherwise, all chemicals were obtained from Sigma Aldrich. Peptides were  
430 prepared by MIT's Koch Institute Biopolymers and Proteomics Facility (Cambridge, MA) and  
431 Boston Open Labs LLC (Cambridge, MA). All peptides were HPLC purified unless specified  
432 otherwise, desalted using reverse phase HPLC with 0.05% TFA, and lyophilized after synthesis  
433 with >95% purity. For fluorescently labeled peptides, a 5-carboxyfluorescein (Anaspec)

434 fluorophore is added to the N-terminus whereas the C-terminus is modified to be an amide.  
435 Fluorescent peptides were diluted into 200 mM NaCl with 20 mM HEPES, pH 7 buffer at 10 uM  
436 concentration for transport experiments. The gel peptides were all dissolved in 20 mM NaCl, 20  
437 mM HEPES, pH 7 buffer at 2% (w/v). To facilitate solubilization and gel formation, peptides  
438 were vortexed for 30 seconds and briefly sonicated in a bath sonicator (Branson 2510) to reduce  
439 aggregation.

440

441 Capillary Assay and Analysis:

442 1.5 inch length borosilicate square capillaries with 9 mm cross sectional width (Vitrocom 8290)  
443 are loaded by piercing pre-made hydrogels. 10 uM solutions (200 mM NaCl, 20 mM HEPES pH  
444 7) of fluorescent peptides are injected into the capillary and sealed by a 1:1:1 (by weight)  
445 mixture of Vaseline, lanolin, and paraffin. Time lapses of peptide diffusion are taken using at 1  
446 minute intervals for up to five hours on a Nikon Ti Eclipse inverted microscope using a Nikon  
447 CFI Plan UW 2X or on an AxioObserver D.1 with a EC Plan-Neofluar 1.25x/0.03 WD=3.9 and  
448 Hamamatsu C11440-22CU camera. All fluorescence profiles were obtained by averaging the  
449 fluorescence intensities across the width of the capillary. Normalized concentration profiles  
450 were obtained by normalizing fluorescence intensities to the bath concentration of the capillary  
451 at the initial time point. The fluorescence signal is linear up to 50 uM (Supplementary Figure  
452 5). For concentration profile plotting, the signal is not adjusted past the saturation point and  
453 represents the lower bound of the actual concentration of reporters accumulating in the gel. All  
454 data presented represents at least three independent replicates. Student's t-test was applied to  
455 determine p-values between experimental conditions.

456

457 Effective diffusion rates were fit by minimizing the squared error of a simulated concentration  
458 timecourse in a region of the capillary on the gel side of the interface, over a 100-minute  
459 window. To do this, the diffusion equation for the concentration of probe  $c$ :

$$460 \quad \frac{\partial c(x, t)}{\partial t} = D \frac{\partial^2 c(x, t)}{\partial x^2}$$

461 was numerically solved using Matlab's *pdepe* function (MathWorks; Natick, MA). The initial  
462 condition  $c(x,0)$  was set by the concentration profile at the first timepoint used, and the boundary  
463 conditions  $c(0,t)$  and  $c(L,t)$  (for a fit over length  $L$ ) were similarly determined by the  
464 concentration profiles at the edges of the region of interest. The  $D$  that minimized the squared  
465 difference between simulated and actual concentration profiles was the value reported;  
466 minimization of error took place iteratively using a home-written modified gradient descent  
467 algorithm. The time period from 150-250 minutes was generally used for fitting, but for  
468 particularly fast-diffusing probes ( $D > 1000 \mu\text{m}^2/\text{min}$ ) 50-150 or 30-130 minutes was used. The  
469 earlier time period allowed for the fitting to take place before steady-state or pseudo-steady state  
470 was reached, which was crucial for fitting to be precise. Code for the diffusion analysis is  
471 provided in the supplementary materials.

472

473 Rheological Testing:

474 Experiments were performed on an Anton Paar MCR 302 Rheometer in a cone-plate geometry  
475 with a 25mm diameter, 1 degree cone angle, and 51 micron truncation. The temperature was  
476 maintained at 25C and evaporation controlled with an H<sub>2</sub>O-filled solvent trap. To identify the  
477 linear regime, amplitude sweeps were conducted at  $\omega = 10 \text{ rad/s}$  from  $\gamma_0 = 0.01\%$  to 100%  
478 strain. In the linear regime, frequency sweeps were conducted using the previously determined  
479 strain amplitude from  $\omega = 100 \text{ rad/s}$  to 0.1 rad/s.

480

481 Transmission Electron Microscopy:

482 Images were taken using a JEOL-1200 transmission electron microscope. Gels were formed as

483 aforementioned and spotted onto glow discharged carbon-coated copper-Formvar grids (Ted

484 Pella). Excess liquid and gel were removed using Whatman paper or parafilm. Grids were

485 submerged in 1% uranyl acetate solution, blotted, and air dried for 15 minutes prior to imaging.

486 Images of gels are representative of at least four images taken of each gel type.

487

488 Phenyl-sepharose chromatography:

489 Fluorescent reporters were dissolved in 200 mM NaCl, 20 mM HEPES pH 7 and loaded into

490 high-copy FF 1 mL capacity phenyl-sepharose columns equilibrated with three volumes of 200

491 mM NaCl, 20 mM HEPES pH 7. For elution, flow rates were set to 1 ml/min with 0.5 mL

492 fraction volumes. The fraction concentrations are representative traces of elution profiles.

493

494 Nile Red Fluorescence Assay:

495 Using the same transport methods, Nile Red dye (Thermo Fischer Scientific, N1142) was loaded

496 into capillaries at 10 ug/ml concentrations in 200 mM NaCl, 20 mM HEPES buffers, pH 7.

497

498 Acknowledgements:

499 This work was supported by the MRSEC Program of the National Science Foundation under

500 award number DMR – 0819762, Defense Threat Reduction Agency under award number

501 HDTRA1-13-1-0038, NSF RO1 R01-EB017755, and NSF Career PHY-1454673. W.G.C. was

502 supported by the NIGMS/NIH Interdepartmental Biotechnology Training Program under T32

503 GM008334. J.W. was supported in part by the National Science Foundation Graduate  
504 Research Fellowship Program under Grant No. 1122374. We wish to thank Prof. Alan Grodzinsky  
505 at MIT for his valuable feedback and helpful discussions, and Felice Frankel for the images of  
506 the gels.

507 Competing interests:

508 The authors declare no competing interests.

509

510 **Figure Legends:**

511 Figure 1: Identification of conserved repeat sequences and design of simplified FG self-  
512 assembling peptides

513 A) Conserved sequence identification of the C-terminal end of essential yeast nucleoporin Nsp1.

514 B) Conservation of charge between FSFG domains in Nsp1 sequences. Positive/negative values  
515 refer to the presence of cationic or anionic residues. Amino acid numbers correspond to position

516 in the consensus repeats as seen in Figure 1A. C) Simplified peptides consisting of 14 amino

517 acids were designed with the sequence structure FSFGAXAAXAFSFG where X represents the

518 substituted amino acids lysine (K), glutamic acid (E), or serine (S) to determine how presence of

519 charge affects FG-mediated selectivity. C) Designed peptides where the lysines are moved either

520 immediately adjacent (FGK) or placed three away (FGA<sub>2</sub>K) from FSFG domains to test how

521 spatial localization of charge influences FG selectivity. D) Class of peptides where lysines (K)

522 are substituted with arginine (R) or aspartic acid (D) to determine how biochemistry affects FG-

523 mediated selectivity and self-assembly.

524

525 Figure 2: FGAK and FGAE self-assembly and selectivity of native transport receptor NTF2

526 A) Frequency sweep of FGAK gel with  $G'$  (storage) and  $G''$  (loss) moduli reported at 2% (w/v)  
527 with TEM image of self-assembled peptides and macroscopic gel (inset). B) Frequency sweep of  
528 FGAE gel with  $G'$  (storage) and  $G''$  (loss) moduli reported at 2% (w/v) with TEM image of self-  
529 assembled peptides and macroscopic gel (inset). C) Schematic of slab 1-D transport system  
530 within a sealed capillary providing no flux boundary conditions. Example diffusion of  
531 fluorescent molecules is depicted at 10 minute, 30 minute, and 60 minute timepoints. The  
532 interface of the gel is depicted by the increase in fluorescence signal between the buffer and  
533 hydrogel. D-E) Transport of representative fluorescently labeled NTF2 and W7A proteins into  
534 FGAK and FGAE gels, respectively. The fluorescent images and corresponding concentration  
535 profiles are at the 5-hour time point. F) The max concentration at the interface and effective  
536 diffusion coefficient are quantified for both NTF2 and W7A in FGAK and FGAE gels. All error  
537 bars are standard deviations of at least three independent replicates. \* indicates  $p < 0.05$  using  
538 unpaired Student's t-test.

539

540 Figure 3: Effects of spatial localization of charge on FG-mediated self-assembly and selectivity  
541 A) Frequency sweep of FGA<sub>2</sub>K and FGK gels with  $G'$  (storage) and  $G''$  (loss) moduli reported at  
542 2% (w/v). B) Schematic of the four fluorescent reporters that contain a charged domain and a  
543 hydrophilic (N) or hydrophobic (F) tail. Fluorescent reporters are loaded into capillaries  
544 containing the gel of choice where diffusion is monitored for up to 5 hours. C) Representative  
545 fluorescence images of Hydrophobic (-) and Hydrophilic (-) reporters into FGAK gel with the  
546 corresponding concentration profile, max concentration at gel interface, and estimated effective  
547 diffusion coefficient. D) Representative fluorescence images of Hydrophobic (+) and  
548 Hydrophilic (+) reporters into FGAK gel with the corresponding concentration profile, max



549 concentration at gel interface, and estimated effective diffusion coefficient. An additional low  
550 salt condition was added (20 mM NaCl) for Hydrophobic (+) reporters as a comparison to  
551 standardized (200 mM NaCl) conditions for max concentration and effective diffusion  
552 estimation. E) Representative fluorescence images of Hydrophobic (-) and Hydrophilic (-)  
553 reporters into FGA<sub>2</sub>K gel with the corresponding concentration profile, max concentration at gel  
554 interface, and estimated effective diffusion coefficient. F) Representative fluorescence images of  
555 Hydrophobic (+) and Hydrophilic (+) reporters into FGA<sub>2</sub>K gel with the corresponding  
556 concentration profile, max concentration at gel interface, and estimated effective diffusion  
557 coefficient. All error bars are standard deviations of at least three independent replicates. \*  
558 indicates  $p < 0.05$ . \*\* indicates  $p < 0.01$  between hydrophobic and hydrophilic reporters using  
559 unpaired Student's t-test.

560

561 Figure 4: Glutamic acid reverses selectivity of FG-based gels and arginine displays similar  
562 selectivity to lysine

563 A)-B) Representative Hydrophobic (-) and Hydrophobic (+) fluorescence images in FGAK gels  
564 for comparison to FGAE and FGAR gel selectivity. C) Representative fluorescence images of  
565 Hydrophobic (-) and Hydrophilic (-) reporters into FGAE gel with the corresponding  
566 concentration profile, max concentration at gel interface, and estimated effective diffusion  
567 coefficient. D) Representative fluorescence images of Hydrophobic (+) and Hydrophilic (+)  
568 reporters into FGAE gel with the corresponding concentration profile, max concentration at gel  
569 interface, and estimated effective diffusion coefficient. E) Representative fluorescence images of  
570 Hydrophobic (-) and Hydrophilic (-) reporters into FGAR gel with the corresponding  
571 concentration profile, max concentration at gel interface, and estimated effective diffusion

572 coefficient. F) Representative fluorescence images of Hydrophobic (+) and Hydrophilic (+)  
573 reporters into FGAR gel with the corresponding concentration profile, max concentration at gel  
574 interface, and estimated effective diffusion coefficient. All error bars are standard deviations of  
575 at least three independent replicates. \* indicates  $p < 0.05$ . \*\* indicates  $p < 0.01$  between  
576 hydrophobic and hydrophilic reporters using unpaired Student's t-test.

577

578 Figure 5: Comparison of selective transport of tryptophan and phenylalanine in FGAK gels

579 A) Comparison of Hydrophobic (-F) and Hydrophobic (-W) reporters into FGAK gels with

580 representative fluorescent images and corresponding concentration profiles. Estimated max

581 interface concentrations and effective diffusion coefficients are presented. B) Comparison of

582 Hydrophobic (+F) and Hydrophobic (+W) reporters into FGAK gels with representative

583 fluorescent images and corresponding concentration profiles. Estimated max interface

584 concentrations and effective diffusion coefficients are presented. All error bars are standard

585 deviations of at least three independent replicates. No significant differences are reported using

586 Student's t-test.

587

588 Figure 6: Role of electrostatics in modulating hydrophobic FG function

589 Schematic of the influence of electrostatic on hydrophobic interactions mediated by FG-domains.

590 At physiologically relevant salt concentrations, electrostatic interactions typically have a range of

591  $\sim 1$  nm (Debye length), which determines how much a charged residue can influence what

592 hydrophobic substrates FG-domains can recognize and bind to. By moving charged residues

593 further away, the electrostatic effects will be less significant on FG-mediated self-assembly and

594 selective transport.

595 Supplementary Figure 1: Frequency sweep of F→S substitution (FGAK → SGAS) to determine  
596 effect of phenylalanines on self-assembly of peptides. The elastic modulus ( $G'$ ) and loss modulus  
597 ( $G''$ ) are reported, however, the measured values are below the sensitivity of the rheometer using  
598 the specified cone-plate geometry.

599

600 Supplementary Figure 2: A) Transport of Nile Red dye into FGAK and FGAE gels at the 0 hour  
601 and 3 hour timepoint. Fluorescence indicates the dye is able to access hydrophobic environments  
602 created by FG-domains within the gels. Images are of representative gels from three independent  
603 replicates.

604

605 Supplementary Figure 3:

606 Fractionation of hydrophilic reporters compared to their hydrophobic counterparts in  
607 phenylsepharose columns. The fluorescence signals of each fraction is collected and normalized  
608 to the signal with the highest intensity of emission. For both cationic and anionic reporters, the  
609 hydrophobic reporters are eluted later, indicating that they show an increased retention time, and  
610 thus stronger binding to phenyl sepharose beads.

611

612 Supplementary Figure 4:

613 A) Frequency sweep of FGAD peptide solution with  $G'$  (storage) and  $G''$  (loss) moduli reported  
614 at 2% (w/v) and corresponding TEM image (B). C) Frequency sweep of FGAR gel with  $G'$   
615 (storage) and  $G''$  (loss) moduli reported at 2% (w/v) and corresponding TEM image (D).

616

617 Supplementary Figure 5:

618 Quantification of fluorescence signal of fluorophores as a function of concentration.  
619 Fluorescence signal is approximately linear up to 50 uM concentrations and saturates by 100 uM.  
620 All concentrations are reported according to the experimental curve developed and represent  
621 lower values of the actual concentrations if values exceed 100 uM.

622

## 623 **References:**

- 624 1. Stewart M. Molecular mechanism of the nuclear protein import cycle. *Nature Reviews*  
625 *Molecular Cell Biology*. 2007 Mar 1;8(3):195–208.
- 626 2. Stewart M, Baker RP, Bayliss R, Clayton L, Grant RP, Littlewood T, et al. Molecular  
627 mechanism of translocation through nuclear pore complexes during nuclear protein  
628 import. *FEBS Lett*. 2001 Jun 8;498(2-3):145–9.
- 629 3. Görlich D, Kutay U. Transport between the cell nucleus and the cytoplasm. *Annu Rev*  
630 *Cell Dev Biol*. Annual Reviews 4139 El Camino Way, P.O. Box 10139, Palo Alto, CA  
631 94303-0139, USA; 1999 Nov;15(1):607–60.
- 632 4. Ando D, Zandi R, Kim YW, Colvin M, Rexach M, Gopinathan A. Nuclear pore complex  
633 protein sequences determine overall copolymer brush structure and function. *Biophys J*.  
634 2014 May 6;106(9):1997–2007.
- 635 5. Ribbeck K, Görlich D. Kinetic analysis of translocation through nuclear pore complexes.  
636 *EMBO J*. 2001 Mar 15;20(6):1320–30.
- 637 6. Ghavami A, Veenhoff LM, van der Giessen E, Onck PR. Probing the Disordered Domain  
638 of the Nuclear Pore Complex through Coarse-Grained Molecular Dynamics Simulations.  
639 *Biophysj*. Biophysical Society; 2014 Sep 16;107(6):1393–402.
- 640 7. Gamini R, Han W, Stone JE, Schulten K. Assembly of Nsp1 nucleoporins provides insight  
641 into nuclear pore complex gating. *PLoS Comput Biol*. 2014 Mar;10(3):e1003488.
- 642 8. Ma CD, Wang C, Acevedo-Vélez C, Gellman SH, Abbott NL. Modulation of hydrophobic  
643 interactions by proximally immobilized ions. *Nature*. 2015 Jan 15;517(7534):347–50.
- 644 9. Frey S, Görlich D. A saturated FG-repeat hydrogel can reproduce the permeability  
645 properties of nuclear pore complexes. *CELL*. 2007 Aug 10;130(3):512–23.
- 646 10. Frey S, Richter RP, Görlich D. FG-rich repeats of nuclear pore proteins form a three-  
647 dimensional meshwork with hydrogel-like properties. *Science*. 2006 Nov  
648 3;314(5800):815–7.
- 649 11. Frey S, Görlich D. FG/FxFG as well as GLFG repeats form a selective permeability

- 650 barrier with self-healing properties. *EMBO J.* 2009 Aug 13;28(17):2554–67.
- 651 12. Ribbeck K, Görlich D. The permeability barrier of nuclear pore complexes appears to  
652 operate via hydrophobic exclusion. *EMBO J.* 2002 Jun 3;21(11):2664–71.
- 653 13. Bayliss R, Littlewood T, Strawn LA, Wentz SR, Stewart M. GLFG and FxFG  
654 nucleoporins bind to overlapping sites on importin-beta. *J Biol Chem.* 2002 Dec  
655 27;277(52):50597–606.
- 656 14. Bayliss R, Ribbeck K, Akin D, Kent HM, Feldherr CM, Görlich D, et al. Interaction  
657 between NTF2 and xFxFG-containing nucleoporins is required to mediate nuclear import  
658 of RanGDP. *J Mol Biol.* 1999 Oct 29;293(3):579–93.
- 659 15. Strawn LA, Shen T, Wentz SR. The GLFG regions of Nup116p and Nup100p serve as  
660 binding sites for both Kap95p and Mex67p at the nuclear pore complex. *J Biol Chem.*  
661 2001 Mar 2;276(9):6445–52.
- 662 16. Grant RP, Neuhaus D, Stewart M. Structural basis for the interaction between the  
663 Tap/NXF1 UBA domain and FG nucleoporins at 1A resolution. *J Mol Biol.* 2003 Feb  
664 21;326(3):849–58.
- 665 17. Bednenko J, Cingolani G, Gerace L. Importin beta contains a COOH-terminal nucleoporin  
666 binding region important for nuclear transport. *J Cell Biol.* 2003 Aug 4;162(3):391–401.
- 667 18. Strawn LA, Shen T, Shulga N, Goldfarb DS, Wentz SR. Minimal nuclear pore complexes  
668 define FG repeat domains essential for transport. *Nat Cell Biol.* 2004 Feb 22;6(3):10–206.
- 669 19. Patel SS, Belmont BJ, Sante JM, Rexach MF. Natively unfolded nucleoporins gate protein  
670 diffusion across the nuclear pore complex. *CELL.* 2007 Apr 6;129(1):83–96.
- 671 20. Ribbeck K, Kutay U, Paraskeva E, Görlich D. The translocation of transportin–cargo  
672 complexes through nuclear pores is independent of both Ran and energy. *Current biology.*  
673 1999.
- 674 21. Colwell LJ, Brenner MP, Ribbeck K. Charge as a selection criterion for translocation  
675 through the nuclear pore complex. *PLoS Comput Biol.* 2010 Apr;6(4):e1000747.
- 676 22. Tagliazucchi M, Peleg O, Kröger M, Rabin Y, Szleifer I. Effect of charge, hydrophobicity,  
677 and sequence of nucleoporins on the translocation of model particles through the nuclear  
678 pore complex. *Proceedings of the National Academy of Sciences.* 2013 Feb  
679 26;110(9):3363–8.
- 680 23. Ando D, Colvin M, Rexach M, Gopinathan A. Physical Motif Clustering within  
681 Intrinsically Disordered Nucleoporin Sequences Reveals Universal Functional Features.  
682 *PLoS ONE.* 2013;8(9):e73831.
- 683 24. Yamada J, Phillips JL, Patel S, Goldfien G, Caestagne-Morelli A, Huang H, et al. A  
684 bimodal distribution of two distinct categories of intrinsically disordered structures with

- 685 separate functions in FG nucleoporins. *Mol Cell Proteomics*. 2010 Oct;9(10):2205–24.
- 686 25. Zhang S. Fabrication of novel biomaterials through molecular self-assembly. *Nature*  
687 *Biotechnology*. 2003 Oct;21(10):1171–8.
- 688 26. Hinman MB, Jones JA, Lewis RV. Synthetic spider silk: a modular fiber. *Trends*  
689 *Biotechnol*. 2000 Sep;18(9):374–9.
- 690 27. Xu M, Lewis RV. Structure of a protein superfiber: spider dragline silk. *Proceedings of*  
691 *the National Academy of Sciences*. 1990 Sep 15;87(18):7120–4.
- 692 28. Meyer DE, Chilkoti A. Quantification of the effects of chain length and concentration on  
693 the thermal behavior of elastin-like polypeptides. *Biomacromolecules*. 2004  
694 May;5(3):846–51.
- 695 29. Nettles DL, Chilkoti A, Setton LA. Applications of elastin-like polypeptides in tissue  
696 engineering. *Adv Drug Deliv Rev*. 2010 Dec;62(15):1479–85.
- 697 30. Wright ER, Conticello VP. Self-assembly of block copolymers derived from elastin-  
698 mimetic polypeptide sequences. *Adv Drug Deliv Rev*. 2002 Oct 18;54(8):1057–73.
- 699 31. Hurt EC. A novel nucleoskeletal-like protein located at the nuclear periphery is required  
700 for the life cycle of *Saccharomyces cerevisiae*. *EMBO J*. 1988 Dec 20;7(13):4323–34.
- 701 32. Denning DP. Disorder in the nuclear pore complex: The FG repeat regions of  
702 nucleoporins are natively unfolded. *Proceedings of the National Academy of Sciences*.  
703 2003 Feb 25;100(5):2450–5.
- 704 33. Denning DP, Uversky V, Patel SS, Fink AL. The *Saccharomyces cerevisiae* nucleoporin  
705 Nup2p is a natively unfolded protein. ... of *Biological Chemistry*. 2002.
- 706 34. Chen S, Itoh Y, Masuda T, Shimizu S, Zhao J, Ma J, et al. Ionic interactions.  
707 Subnanoscale hydrophobic modulation of salt bridges in aqueous media. *Science*. 2015  
708 May 1;348(6234):555–9.
- 709 35. Hülsmann BB, Labokha AA, Görlich D. The permeability of reconstituted nuclear pores  
710 provides direct evidence for the selective phase model. *CELL*. 2012 Aug 17;150(4):738–  
711 51.
- 712 36. Ader C, Frey S, Maas W, Schmidt HB, Görlich D, Baldus M. Amyloid-like interactions  
713 within nucleoporin FG hydrogels. *Proceedings of the National Academy of Sciences*.  
714 2010 Apr 6;107(14):6281–5.
- 715 37. Friedman AK, Baker LA. Synthetic hydrogel mimics of the nuclear pore complex display  
716 selectivity dependent on FG-repeat concentration and electrostatics. - PubMed - NCBI.  
717 *Soft Matter*. 2016.
- 718 38. Labokha AA, Gradmann S, Frey S, Hülsmann BB, Urlaub H, Baldus M, et al. Systematic

- 719 analysis of barrier-forming FG hydrogels from *Xenopus* nuclear pore complexes. *EMBO*  
720 *J.* 2013 Jan 23;32(2):204–18.
- 721 39. Eisele NB, Labokha AA, Frey S, Görlich D, Richter RP. Cohesiveness tunes assembly and  
722 morphology of FG nucleoporin domain meshworks - Implications for nuclear pore  
723 permeability. *Biophys J.* 2013 Oct 15;105(8):1860–70.
- 724 40. Eisele NB, Frey S, Piehler J, Görlich D, Richter RP. Ultrathin nucleoporin phenylalanine-  
725 glycine repeat films and their interaction with nuclear transport receptors. *EMBO Rep.*  
726 2010 May;11(5):366–72.
- 727 41. Zahn R, Osmanović D, Ehret S, Callis CA, Frey S, Stewart M, et al. A physical model  
728 describing the interaction of nuclear transport receptors with FG nucleoporin domain  
729 assemblies. *Elife.* eLife Sciences Publications Limited; 2016 Apr 8;5:e14119.
- 730 42. Holten-Andersen N, Zhao H, Waite JH. Stiff coatings on compliant biofibers: the cuticle  
731 of *Mytilus californianus* byssal threads. *Biochemistry.* 2009 Mar 31;48(12):2752–9.
- 732 43. Waller KA, Zhang LX, Elsaid KA, Fleming BC, Warman ML, Jay GD. Role of lubricin  
733 and boundary lubrication in the prevention of chondrocyte apoptosis. *Proc Natl Acad Sci*  
734 *USA.* 2013 Mar 25;:-.
- 735 44. Rose MC, Voynow JA. Respiratory tract mucin genes and mucin glycoproteins in health  
736 and disease. *Physiol Rev.* 2006 Jan;86(1):245–78.
- 737 45. Crooks GE, Hon G, Chandonia J-M, Brenner SE. WebLogo: a sequence logo generator.  
738 *Genome Res.* 2004 Jun;14(6):1188–90.
- 739

Fig 1

A

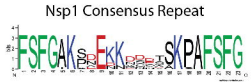

B

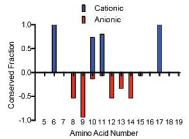

C

Charge Relevance

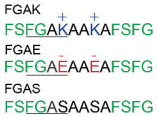

D

Spatial Localization

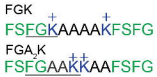

E

Sidechain Biochemistry

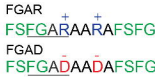



Fig 2

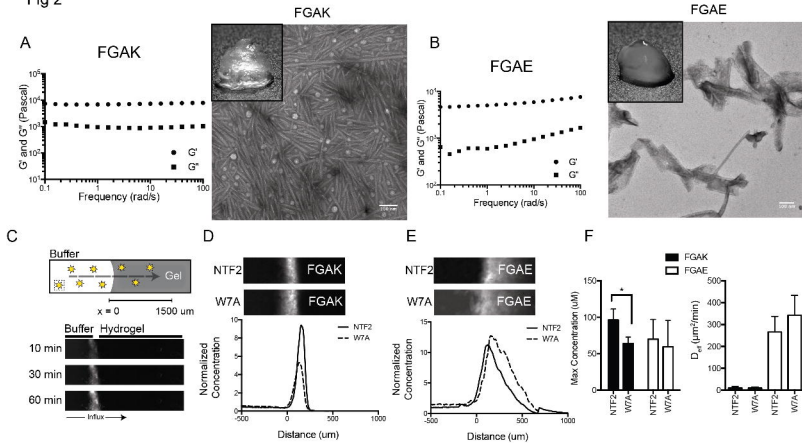

Fig 3

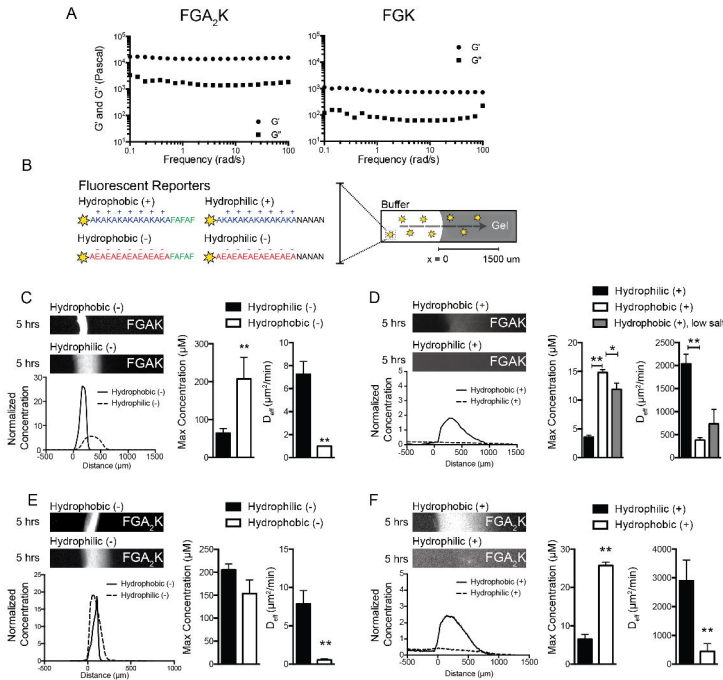

**Fig 4**

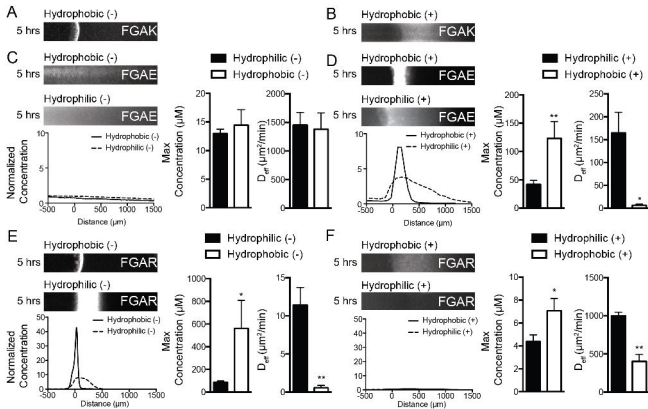

Fig 5

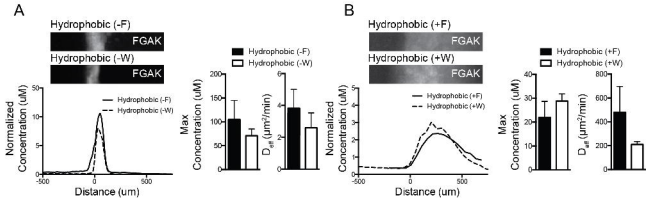

Fig 6

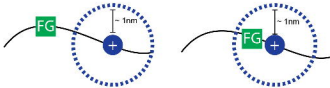

increasing electrostatic influence

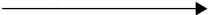

Source: http://www.biorxiv.org/content/10.1101/090159v1.full.pdf
